# Supplementary material for: Effective Elimination of Contaminant Antibiotics Using High-Surface-Area Magnetic-Functionalized Graphene Nanocomposites Developed from Plastic Waste
Source: MDPI journal article supplement (doi:10.3390/ma13071517), 2020-03-26
Supplement: s1 [file s1]

# Effective Elimination of Contaminant Antibiotics Using High-Surface-Area Magnetic-Functionalized Graphene Nanocomposites Developed from Plastic Waste

Noha A. Elessawy<sup>1,\*</sup>, M. H. Gouda<sup>2</sup>, Safaa M. Ali<sup>3</sup>, M. Salerno<sup>4</sup> and M. S. Mohy Eldin<sup>2</sup>

<sup>1</sup> Advanced Technology and New Materials Research Institute, City of Scientific Research and Technological Applications (SRTA-City), New Borg El-Arab City 21934, Alexandria, Egypt.

<sup>2</sup> Polymer Materials Research Department, Advanced Technology and New Materials Research Institute, City of Scientific Research and Technological Applications (SRTA-City), New Borg El-Arab City 21934, Alexandria, Egypt; marwagouda777@yahoo.com (M.H.G.), mohy108@gmail.com (M.E.)

<sup>3</sup> Nucleic Acid Research Department, Genetic Engineering and Biotechnology Research Institute (GEBRI), City for Scientific Research and Technological Applications (SRTA, City), New Borg El-Arab, 21934 Alexandria, Egypt; safaa.mohamedali@yahoo.com.

<sup>4</sup> Materials Characterization Facility, Istituto Italiano di Tecnologia, 16163 Genova, Italy; marco.salerno@iit.it.

\* Correspondence: nony\_essawy@yahoo.com

Received: 13 February 2020; Accepted: 19 March 2020; Published: date

## Characterization of HRGO and Its Derivatives

An X-ray Photoelectron Spectroscopy (XPS) Phi 5300 ESCA system (Perkin-Elmer, U.S.A) with Mg ( $K\alpha$ ) radiation (X-ray energy 1253.6 eV) was used. X-ray Diffraction (XRD) data (Schimadzu-7000, U.S.A.) was collected with a  $CuK\alpha$  radiation beam ( $\lambda = 0.154060$  nm). Fourier Transform Infrared (FTIR) analysis was conducted using a Bruker ALFA FTIR spectrometer with a range from 400 to 4000  $cm^{-1}$ . A Transmission Electron Microscope (TEM) (TECNAI G20, Netherland with EDX) was also used. A Vibrating Sample Magnetometer (VSM, BHV-55, Riken, Japan) was used for magnetic measurements at room temperature. Raman spectroscopy was conducted at room temperature using a Senterra Raman spectrometer, (Bruker- Germany) with a 514.5 nm excitation wavelength in the range of wave numbers from 40 to 3500  $cm^{-1}$ . The Brunauer–Emmett–Teller (BET) surface area and total pore volume were measured using Barret–Joyner–Halenda (BJH) adsorption methods.

## Acid Groups' Content and Zeta Potential Measurement

The content of acid groups was determined by acid-base titration for SG and MSG, where 0.5 g of SG or MSG was sonicated in 50 mL of 1 M NaCl for 24 h. The suspension was titrated slowly with 0.01 M NaOH solution to reach the neutral point (pH 7) and was monitored using phenolphthalein as an indicator. The equivalent weight (EW) was calculated using:

$$EW = \frac{W}{V_{NaOH} C_{NaOH}} \quad (1)$$

where  $V_{NaOH}$  and  $C_{NaOH}$  are the volume and concentration of NaOH solution used in the titration and  $W$  is the dry weight of SG or MSG samples. The EW for SG and MSG was found to be 0.7 and 0.37  $g\ mol^{-1}$ .

For Zeta potential measurements, 0.05 g of HRGO, SG, or MSG was added into 10 mL of 1M NaCl solutions and the suspensions were sonicated until fully dispersed. The pH of the suspensions was adjusted from pH 3 to 9 using 0.1 M NaOH or HCl, and the Zeta potential was then determined using a Malvern Nanosizer Zeta potential.

## Efficiency Verification of Garamycin and Ampicillin Adsorption Processes

To verify the efficiency of Garamycin and Ampicillin adsorption processes on HRGO, SG, and MSG, an experiment using *E. coli* DH5 $\alpha$ , which has sensitivity to antibiotic concentration  $\geq 50$  ppm, was conducted. The experiment measured the optical density (OD) of culture absorbance at 600 nm after 24 h incubation at 37 °C. The experiment conditions were 500 mg L<sup>-1</sup> antibiotic as initial concentration, a dose of adsorbent of 2 mg mL<sup>-1</sup>, solution pH was adjusted at 5.5, and inoculated with *E. coli* DH5 $\alpha$  were identical and used at the same time in the tubes to evaluate the material difference.

### Kinetics of adsorption process

Kinetics study was important as it describes the uptake rate of adsorbate. The rate and mechanism of the antibiotics adsorption process on adsorbent could be elucidated based on kinetic studies. In order to elucidate the adsorption kinetics, the pseudo-first-order and pseudo second-order models were applied.

$$q_t = q_e(1 - e^{-k_1 t}) \quad (2)$$

$$q_t = \frac{k_2 q_e^2 t}{1 + k_2 q_e t} \times 100 \quad (3)$$

where  $k_1$  and  $k_2$  are pseudo-first-order and pseudo-second-order adsorption rate constants, respectively.

The pseudo-first-order kinetic model is more suitable for low concentration of solute. It can be written in the following form:

$$\ln(q_e - q_t) = \ln q_e - k_1 t \quad (4)$$

where  $q_e$  is the amount of dye adsorbed at saturation per gram of adsorbent (mg g<sup>-1</sup>),  $q_t$  is the amount of dye adsorbed at time  $t$  per gram of adsorbent (mg g<sup>-1</sup>), and  $k_1$  (min<sup>-1</sup>) is the rate constant of the pseudo first-order adsorption. While, the pseudo-second-order kinetic model is dependent on the solute amount adsorbed on the surface of adsorbent and the adsorbed amount at equilibrium.

### Adsorption Isotherms

The antibiotics sorption capacity of the prepared material at different initial concentrations at equilibrium can be illustrated by the adsorption isotherms. Adsorption isotherms describe how the adsorbate interacts with adsorbents and give a thorough understanding of the nature of interaction. Several isotherm equations have been developed and employed for such analysis and the two important isotherms were applied.

### Langmuir Isotherm Model

Langmuir's isotherm was used for monolayer adsorption on a surface containing a finite number of identified sites with negligible interaction between adsorbed molecules and assumes uniform energies of adsorption on the surface. In addition the maximum adsorption depends on the saturation level of monolayer. The Langmuir isotherm is represented by the following linear equation:

$$\frac{q_e}{C_e} = \frac{1}{K_L q_m} + \frac{C_e}{q_m} \quad (5)$$

where  $q_e$  is the solid-phase antibiotic concentration in equilibrium with the liquid-phase concentration  $C_e$  expressed in mole L<sup>-1</sup>,  $q_m$  is the maximum monolayer adsorption capacity (mg g<sup>-1</sup>), and  $K_L$  is an equilibrium constant (L mol<sup>-1</sup>). A straight line with slope of  $1/q_m$  and intercept of  $1/K_L q_m$  is obtained when  $C_e/q_e$  is plotted against  $C_e$ . The separation factor ( $R_L$ ) is a dimensionless constant which is an essential characteristic of the Langmuir model. The equation of  $R_L$  is expressed as:

$$\frac{q_e}{C_e} = \frac{1}{K_L q_m} + \frac{C_e}{q_m} \quad (6)$$

$$R_L = \frac{1}{1 + K_L C_0} \quad (7)$$

where  $C_0$  ( $\text{mg L}^{-1}$ ) is the highest studied initial antibiotic concentration, ( $C_0 = 900 \text{ mg L}^{-1}$ ).  $R_L$  indicates if the isotherm is unfavorable when  $R_L > 1$ , linear at  $R_L = 1$ , favorable at  $0 < R_L < 1$ , or irreversible at  $R_L = 0$ .

### Freundlich Isotherm Model

Adsorbents that follow the Freundlich isotherm equation are assumed to have a heterogeneous surface consisting of sites with different adsorption potentials, and each type of site is assumed to adsorb molecules, as in the Langmuir equation:

$$\ln q_e = \ln K_f + \frac{1}{n \ln C_e} \quad (8)$$

where  $K_f$  is constant (function of energy of adsorption and temperature) and  $n$  is a constant related to adsorption intensity, by plotting  $\ln q_e$  versus  $\ln C_e$  which gave a straight line with slope of  $1/n$  and intercept of  $\ln K_f$ . The magnitude of the "n" shows an indication of the favorability of adsorption.

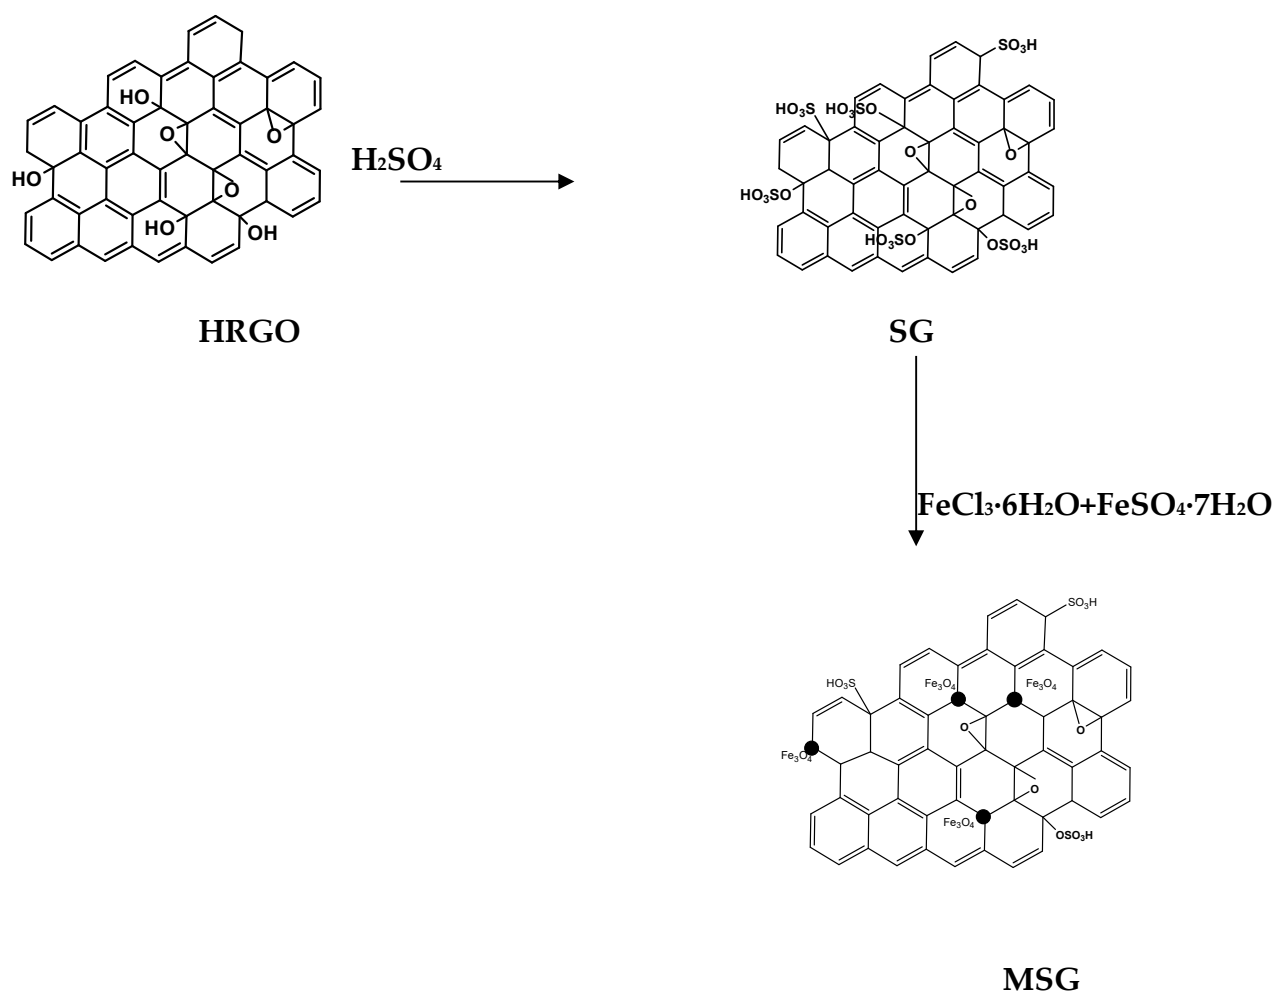

**Figure S1.** The proposed scheme for the formation of SG and MSG.

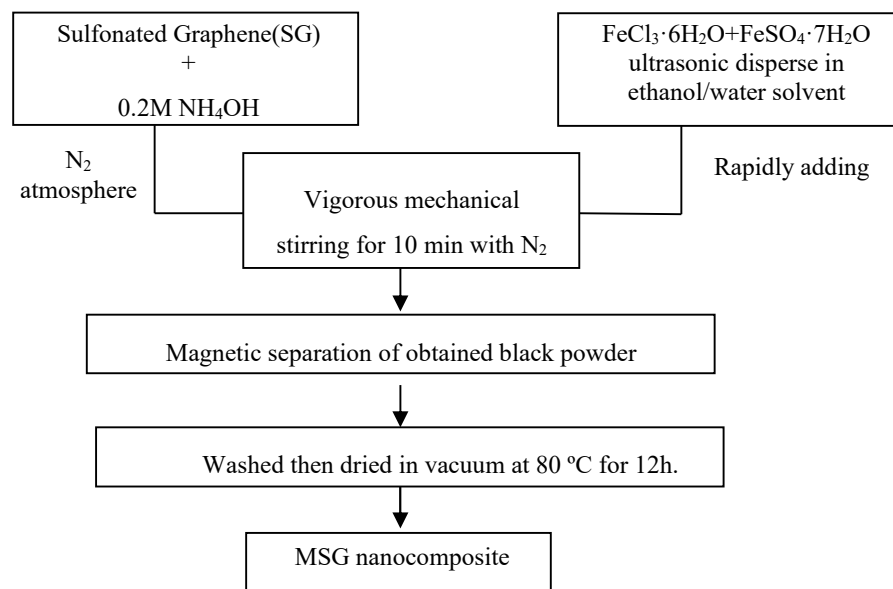

**Figure S2.**The scheme of the preparation of MSG nanocomposite.

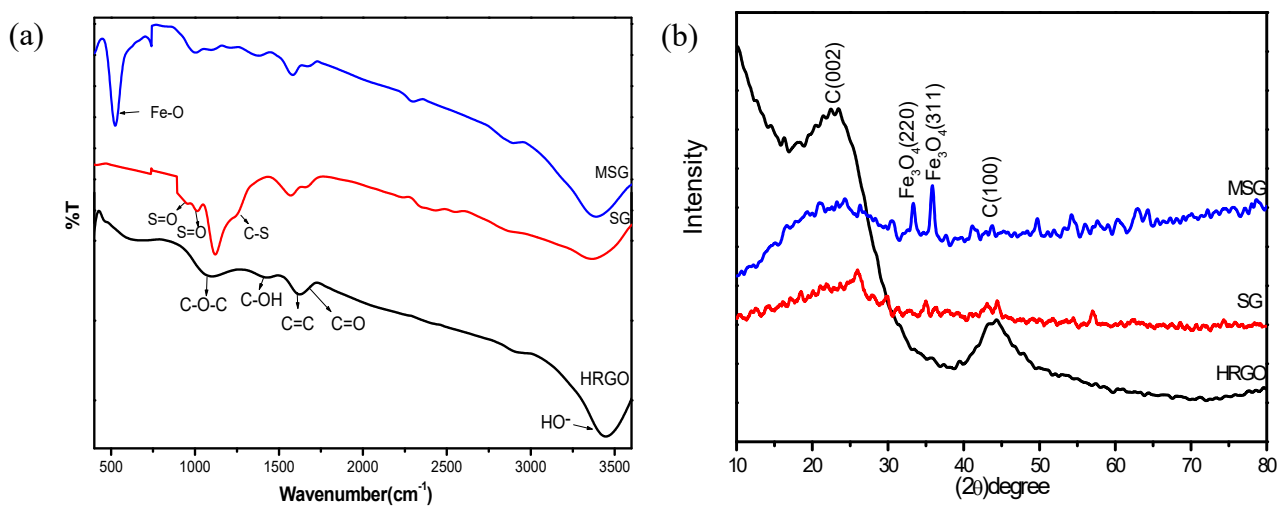

**Figure S3.** (a) FTIR pattern and (b) XRD pattern of HRGO, SG, and MSG samples.

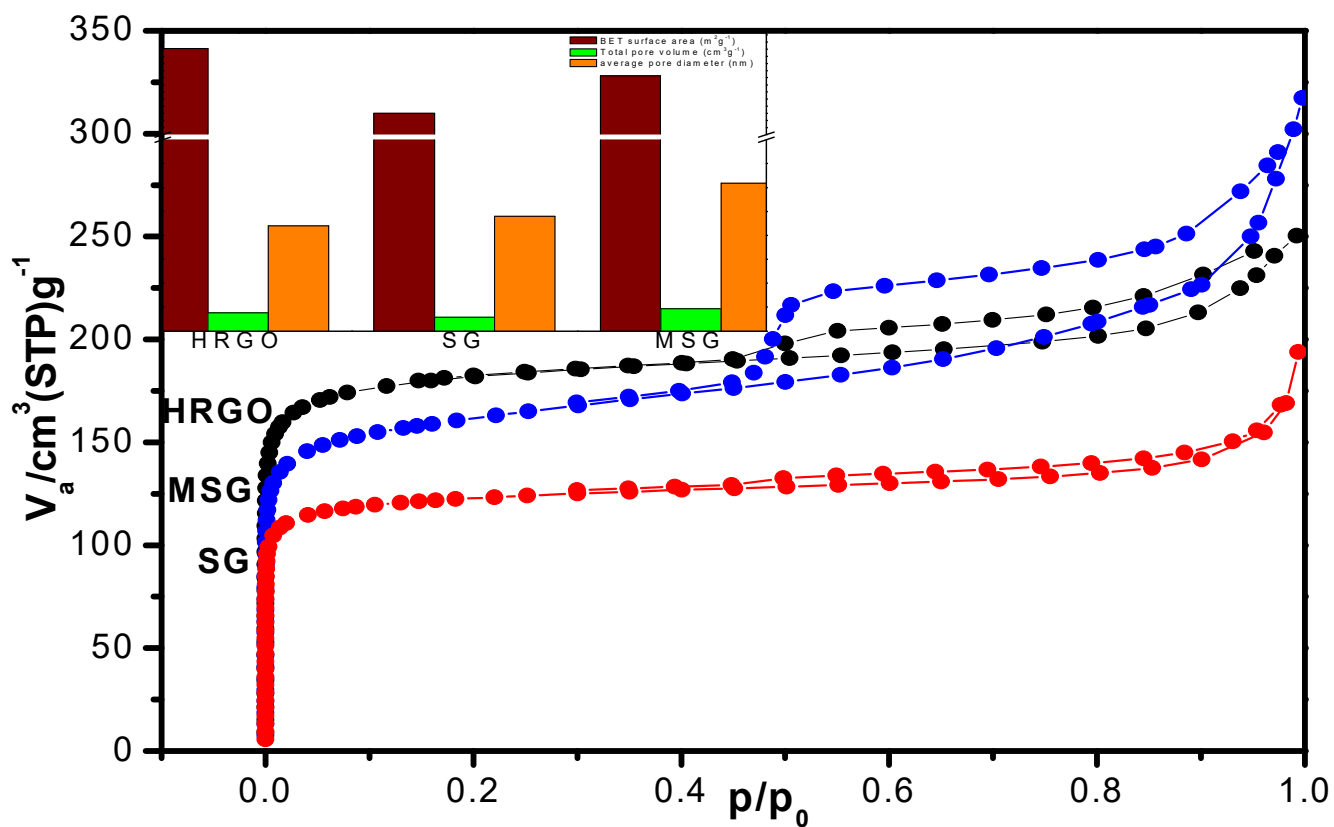

Figure S4.  $N_2$  adsorption-desorption isotherms for the prepared HRGO, SG, and MSG at 77 K (inset: comparable chart for BET surface area, total pore volume, and average pore diameter of HRGO, SG, and MSG).

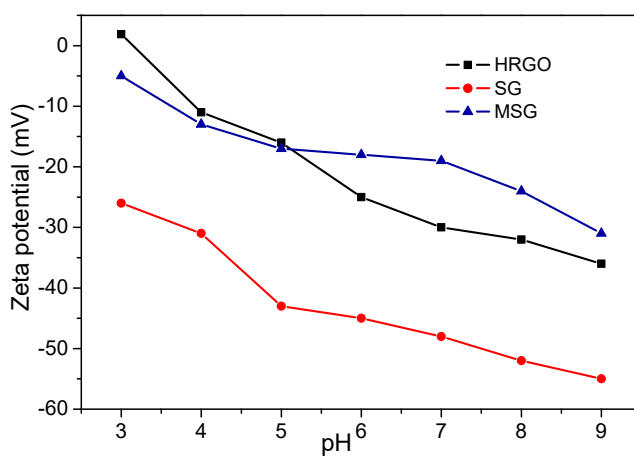

Figure S5. Zeta potential of HRGO, SG, and MSG.

(a)

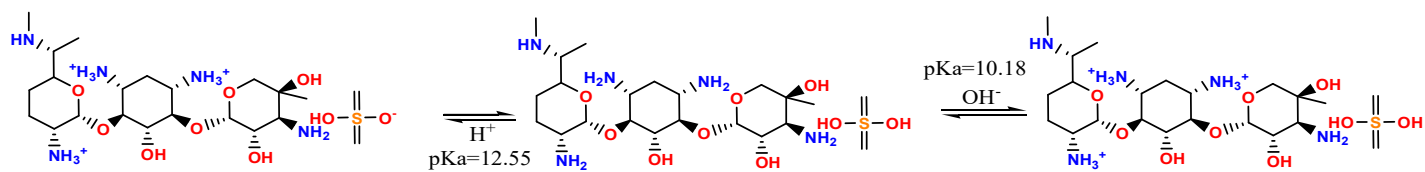

(b)

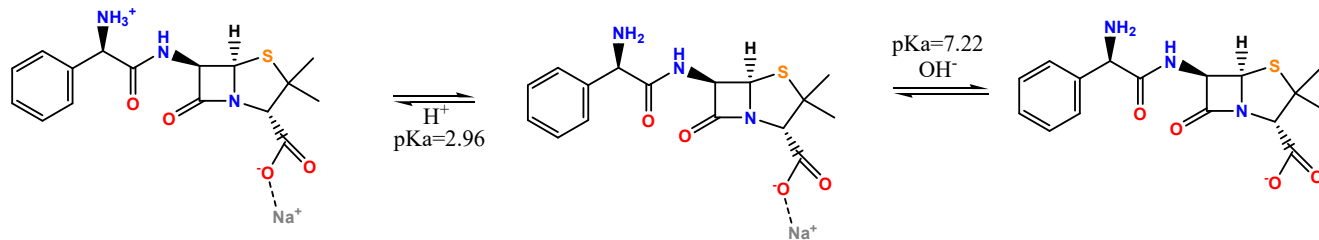

Figure S6. Dissociation of Garamycin and Ampicillin at different pHs.

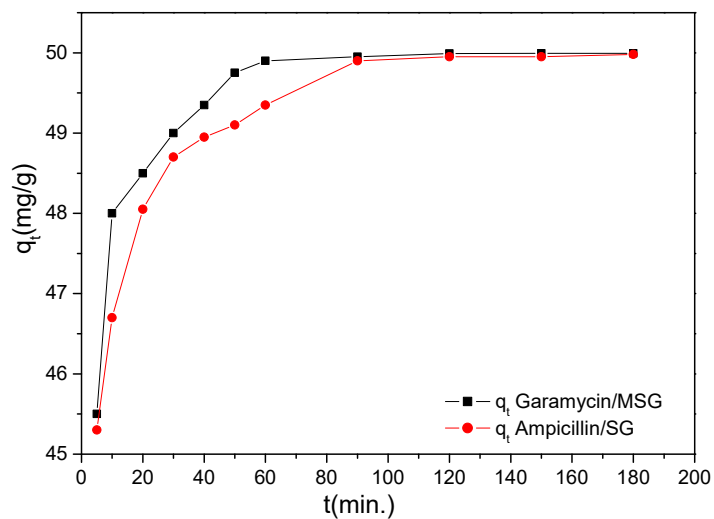

Figure S7. Effect of contact time on the amounts of Garamycin and Ampicillin adsorbed per unit weight of MSG and SG respectively [ $C_0$ : 100 mg L<sup>-1</sup>; Dose of adsorbent: 2 mg/ml; Temperature: 25 °C]

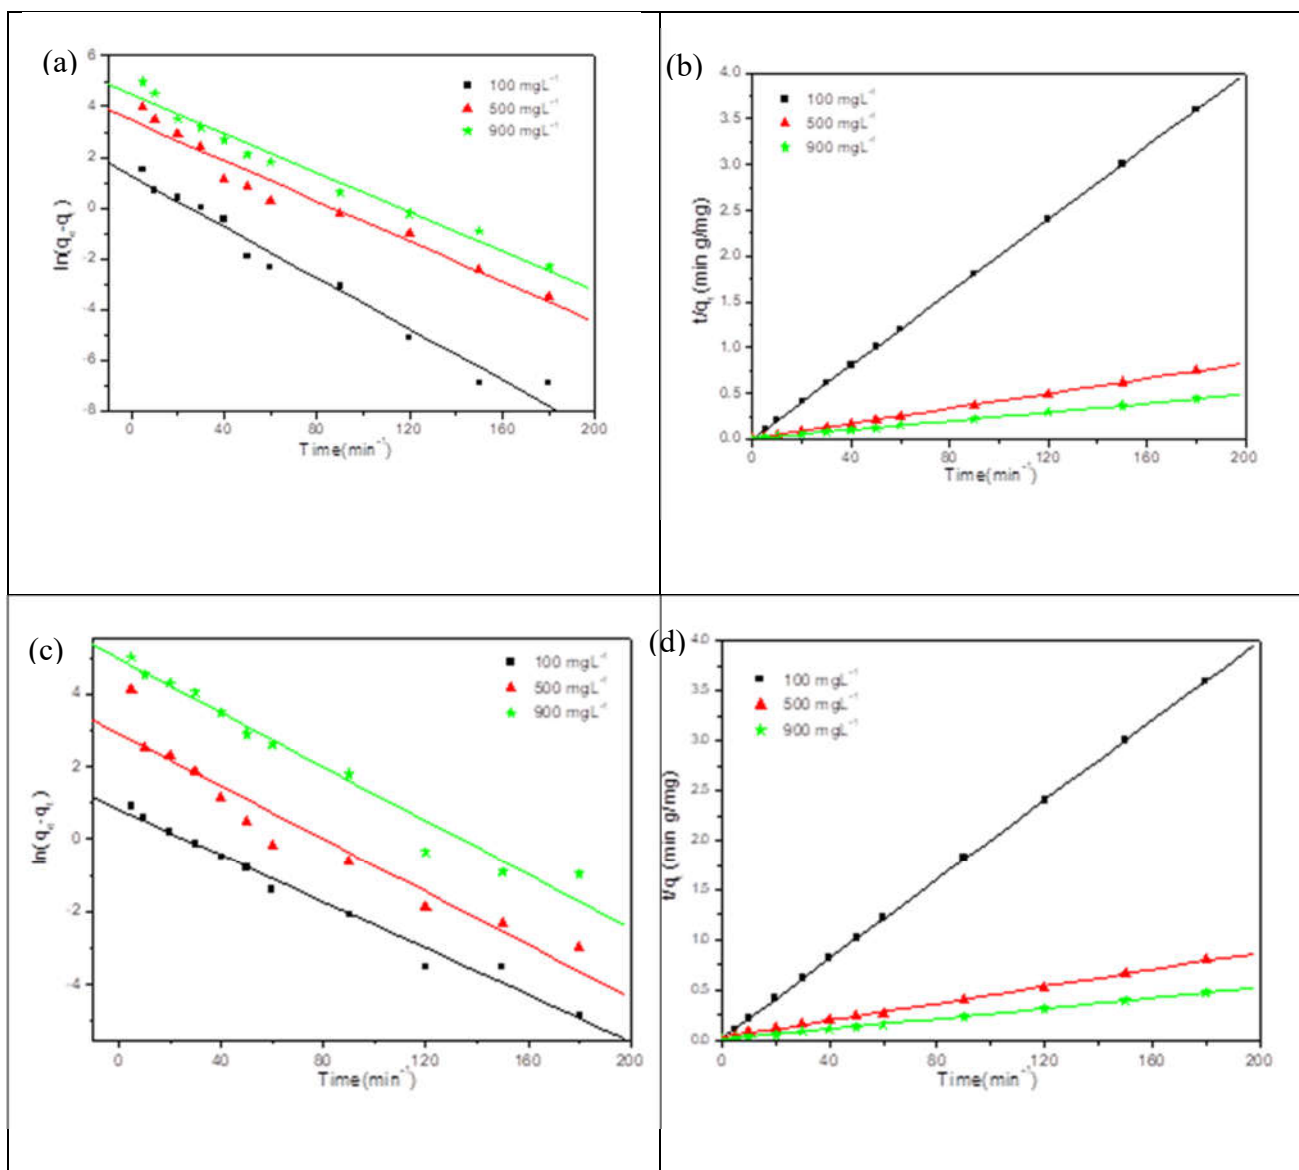

**Figure S8.** Pseudo-first-order and Pseudo-second-order kinetic models for the adsorption of Garamycin on MSG (a) and (b) respectively and Ampicillin on SG (c) and (d), respectively [Conditions: Dose of adsorbent: 2 mg/mL, Temperature: 25°C].

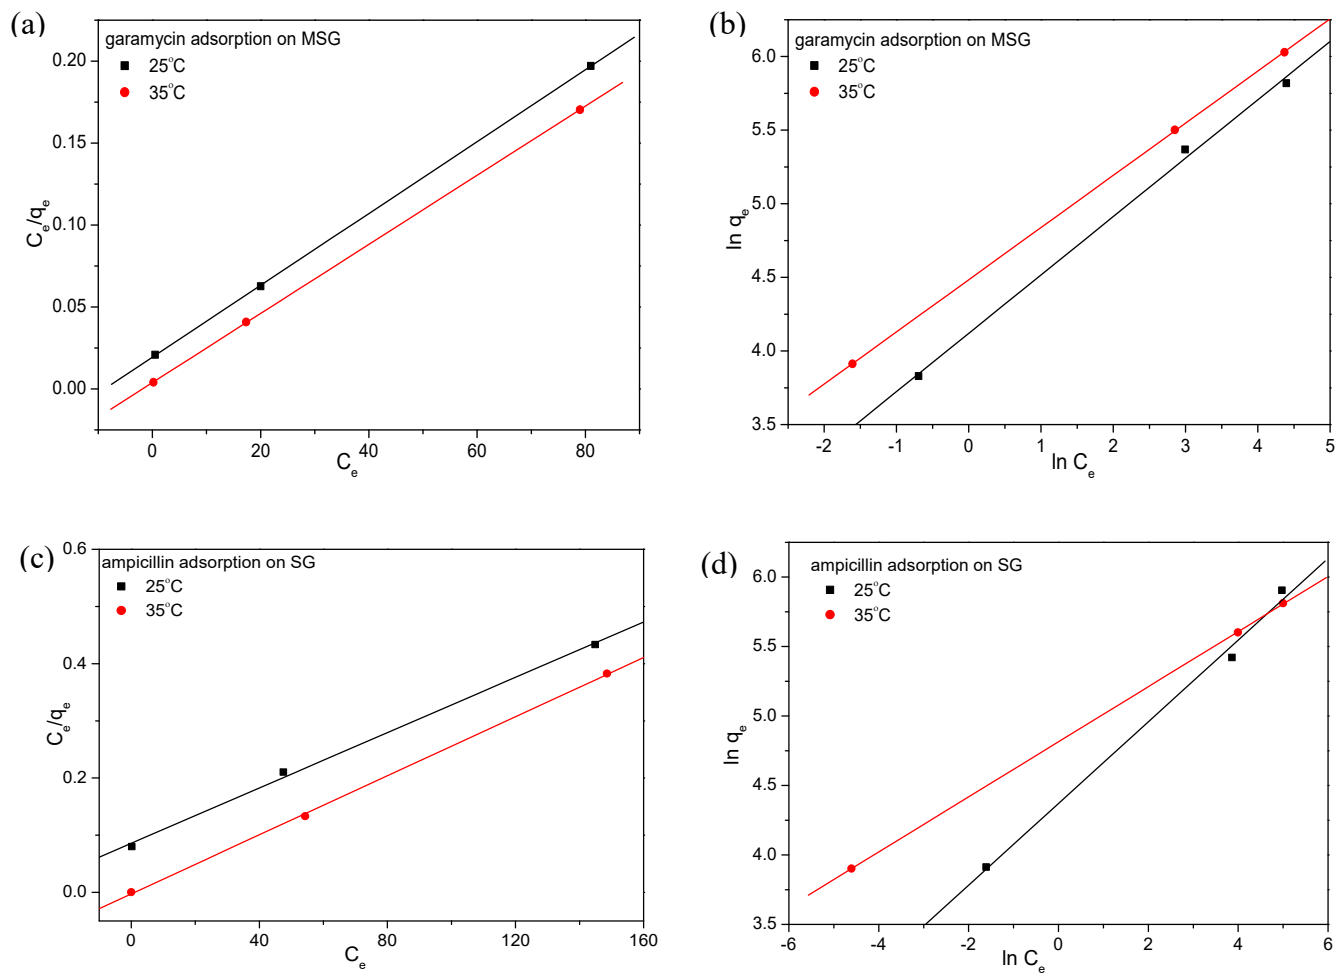

**Figure S9.** Langmuir and Freundlich isotherm models for the adsorption of Garamycin on MSG (a) and (b) respectively and Ampicillin on SG (c) and (d), respectively [Adsorbent dose: 2 mg/mL]



**Table S1.** Representative drug with their, antibiotics classification, IUPAC nomenclature, chemical structure, molecular formula, and molecular weight.

| Representative drug | Antibiotics Classification | IUPAC Nomenclature                                                                                                                           | Chemical Structure                                                                  | Chemical Formula                                                      | Molecular Weight g/mol |
|---------------------|----------------------------|----------------------------------------------------------------------------------------------------------------------------------------------|-------------------------------------------------------------------------------------|-----------------------------------------------------------------------|------------------------|
| Garamycin           | aminoglycosides            | 2-[4,6-diamino-3-[3-amino-6-[1-(methylamino)ethyl]oxan-2-yl]oxy-2-hydroxycyclohexyl]oxy-5-methyl-4-(methylamino)oxane-3,5-diol;sulfuric acid | 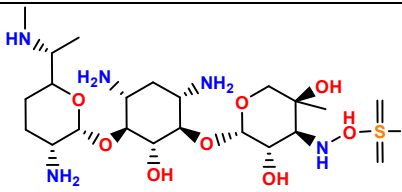 | C <sub>21</sub> H <sub>45</sub> N <sub>5</sub> O <sub>11</sub> S      | 575.675                |
| Ampicillin Sodium   | aminopenicillins           | sodium;(2S,5R,6R)-6-[[[(2R)-2-amino-2-phenylacetyl]amino]-3,3-dimethyl-7-oxo-4-thia-1-azabicyclo[3.2.0]heptane-2-carboxylate                 |  | C <sub>16</sub> H <sub>18</sub> N <sub>3</sub> Na<br>O <sub>4</sub> S | 371.387                |

**Table S2.** The elemental composition and SO<sub>3</sub>H contents of SG and MSG.

|                                                    | SG   | MSG  |
|----------------------------------------------------|------|------|
| Elemental composition (wt.%)                       |      |      |
| C                                                  | 67.3 | 66.4 |
| S                                                  | 5.6  | 3.1  |
| Fe                                                 | -    | 6.1  |
| O                                                  | 27.1 | 24.4 |
| SO <sub>3</sub> H contents (mmol g <sup>-1</sup> ) | 0.7  | 0.37 |

**Table S3.** Analysis of the main elements in the XPS survey spectra of MSG (At.% = atom%).

|       | MSG            |       |
|-------|----------------|-------|
|       | Peak B.E. (eV) | At. % |
| C 1s  | 284.8          | 70.83 |
| O 1s  | 533.0          | 26.58 |
| S 2p  | 169.1          | 1.32  |
| Fe 2p | 711.9          | 1.27  |

**Table S4.** The Texture Feature (Surface Area, Pore Volume and Size) for G, SG, and MSG.

|                                                      | HRGO  | SG    | MSG   |
|------------------------------------------------------|-------|-------|-------|
| BET surface area (m <sup>2</sup> g <sup>-1</sup> )   | 702   | 475   | 607   |
| total pore volume (cm <sup>3</sup> g <sup>-1</sup> ) | 0.386 | 0.288 | 0.469 |
| average pore diameter (nm)                           | 2.2   | 2.4   | 3.09  |

**Table S5.** pH values of the different solution.

|            | The Initial pH Aqueous Solution of Antibiotic | Antibiotic + SG | Antibiotic + MSG |
|------------|-----------------------------------------------|-----------------|------------------|
| Garamycin  | 5.6                                           | 4.8             | 5.6              |
| Ampicillin | 7.1                                           | 5.5             | 6.3              |

**Table S6.** Performance metrics of the prepared nanomaterials used for Garamycin and Ampicillin removal.

|                  | <b>Optimum<br/>pH</b> | <b>Initial<br/>Garamycin<br/>Concentration<br/>(mg L<sup>-1</sup>)</b> | <b>Initial<br/>Ampicillin<br/>Concentration<br/>(mg L<sup>-1</sup>)</b> | <b>Maximum<br/>Adsorption<br/>Capacity(m<br/>g g<sup>-1</sup>)</b> | <b>Maximum<br/>Removal<br/>Efficiency<br/>(%)</b> | <b>Distribution<br/>Coefficient<br/>(mg g<sup>-1</sup> mM<sup>-1</sup>)</b> |
|------------------|-----------------------|------------------------------------------------------------------------|-------------------------------------------------------------------------|--------------------------------------------------------------------|---------------------------------------------------|-----------------------------------------------------------------------------|
| HRGO/ Garamycin  | 6                     | 500                                                                    | –                                                                       | 232.5                                                              | 93                                                | 3824                                                                        |
| HRGO/ Ampicillin | 6                     | –                                                                      | 500                                                                     | 235                                                                | 94                                                | 2909                                                                        |
| MSG/Garamycin    | 5.6                   | 500                                                                    | –                                                                       | 240                                                                | 96                                                | 6908                                                                        |
| MSG/Ampicillin   | 6.3                   | –                                                                      | 500                                                                     | 155                                                                | 62                                                | 303                                                                         |
| SG/Garamycin     | 4.8                   | 500                                                                    | –                                                                       | 162.5                                                              | 65                                                | 534                                                                         |
| SG/Ampicillin    | 5.5                   | –                                                                      | 500                                                                     | 226                                                                | 93.5                                              | 2583                                                                        |

**Table S7.** Central composite matrix of experimental and predicted values for Garamycin removal (%) using prepared MSG and Ampicillin removal (%) using prepared SG at solutions pH 5.5.

| Trial | Time (X1;<br>min) | AdsorbateInitial<br>Concentration<br>(X2;mg/L) | Adsorbent<br>Dose (X3;mg) | Removal (%) |        |           |        |
|-------|-------------------|------------------------------------------------|---------------------------|-------------|--------|-----------|--------|
|       |                   |                                                |                           | Measured    |        | Predicted |        |
|       |                   |                                                |                           | Gara/MSG    | Amp/SG | Gara/MSG  | Amp/SG |
| 1     | 60(0)             | 100(-1)                                        | 0.05(-1)                  | 96.8        | 96     | 89.4      | 82.1   |
| 2     | 60(0)             | 900(1)                                         | 0.05 (-1)                 | 89.4        | 82.1   | 91        | 83.9   |
| 3     | 60(0)             | 100(-1)                                        | 0.15 (1)                  | 99.3        | 97.3   | 92.6      | 85.1   |
| 4     | 60(0)             | 900(1)                                         | 0.15 (1)                  | 93.9        | 89.9   | 93.9      | 87.4   |
| 5     | 30(-1)            | 100(-1)                                        | 0.1 (0)                   | 98          | 97     | 95.1      | 88.3   |
| 6     | 30(-1)            | 900(1)                                         | 0.1 (0)                   | 91          | 83.9   | 96.8      | 89.9   |
| 7     | 90(1)             | 100(-1)                                        | 0.1 (0)                   | 99          | 98.9   | 97        | 91.6   |
| 8     | 90(1)             | 900(1)                                         | 0.1 (0)                   | 92.6        | 91.6   | 98        | 93.1   |
| 9     | 30(-1)            | 500(0)                                         | 0.05 (-1)                 | 95.1        | 85.1   | 98.3      | 96.8   |
| 10    | 30(-1)            | 500(0)                                         | 0.15 (1)                  | 98.3        | 88.3   | 98.7      | 97     |
| 11    | 90(1)             | 500(0)                                         | 0.05 (-1)                 | 97          | 87.4   | 98.9      | 97.1   |
| 12    | 90(1)             | 500(0)                                         | 0.15 (1)                  | 99.1        | 97.1   | 99.1      | 97.3   |
| 13    | 60(0)             | 500(0)                                         | 0.1(0)                    | 98.7        | 93.1   | 99.3      | 98.9   |

**Table S8.** ANOVA analysis of the selected factors on the adsorption efficiency of MSG for garamycin in aqueous solution.

| <i>Regression Statistics</i> |           |           |           |          |                       |
|------------------------------|-----------|-----------|-----------|----------|-----------------------|
| Multiple R                   | 0.998499  |           |           |          |                       |
| R Square                     | 0.996999  |           |           |          |                       |
| Adjusted R Square            | 0.987997  |           |           |          |                       |
| Standard Error               | 0.364005  |           |           |          |                       |
| Observations                 | 13        |           |           |          |                       |
| ANOVA                        |           |           |           |          |                       |
|                              | <i>df</i> | <i>SS</i> | <i>MS</i> | <i>F</i> | <i>Significance F</i> |
| Regression                   | 9         | 132.0717  | 14.67464  | 110.752  | 0.001268              |
| Residual                     | 3         | 0.3975    | 0.1325    |          |                       |
| Total                        | 12        | 132.4692  |           |          |                       |

**Table S9.** ANOVA analysis of the selected factors on the adsorption efficiency of SG for ampicillin in aqueous solution.

| <i>Regression Statistics</i> |           |           |           |          |                       |
|------------------------------|-----------|-----------|-----------|----------|-----------------------|
| Multiple R                   | 0.995854  |           |           |          |                       |
| R Square                     | 0.991725  |           |           |          |                       |
| Adjusted R Square            | 0.9669    |           |           |          |                       |
| Standard Error               | 1.046821  |           |           |          |                       |
| Observations                 | 13        |           |           |          |                       |
| ANOVA                        |           |           |           |          |                       |
|                              | <i>df</i> | <i>SS</i> | <i>MS</i> | <i>F</i> | <i>Significance F</i> |
| Regression                   | 9         | 393.9956  | 43.77729  | 39.94885 | 0.005741              |
| Residual                     | 3         | 3.2875    | 1.095833  |          |                       |
| Total                        | 12        | 397.2831  |           |          |                       |

As illustrated in Tables S7, S8 and S9 of model validations, the agreement between the obtained and estimated removal efficiency showed that using response surface method to design the experiments can be considered as an effective choice in the optimization of process parameters besides its uses as an experimental design and statistical analysis.
